# Supplementary material for: Phosphorus-doped porous carbon derived from rice husk as anode for lithium ion batteries
Source: Royal Society of Chemistry journal article supplement (doi:10.1039/c5ra08148c), 2015-01-01
Supplement: c5ra08148c1.pdf [file c5ra08148c1.pdf]

## Supporting Information

### Phosphorus-doped porous carbon derived from rice husk as anode for Lithium ion batteries

*Jiaqing Wang,<sup>a</sup> Zhenzhong Yang,<sup>b</sup> Fusen Pan,<sup>a</sup> Xiongwu Zhong,<sup>a</sup> Xiaowu Liu,<sup>a</sup>*

*Lin Gu,<sup>b</sup> Yan Yu<sup>\*,a</sup>*

<sup>a</sup> Key Laboratory of Materials for Energy Conversion, Chinese Academy of Sciences, Department of Materials Science and Engineering, University of Science and Technology of China, No. 96 Jinzhai Road, Hefei, Anhui Province, 230026, China. E-mail: yanyumse@ustc.edu.cn,

Telephone: (+86) 055163607179, Fax No: (+86) 055163607179.

<sup>b</sup> Beijing National Laboratory for Condensed Matter Physics, The Institute of Physics, Chinese Academy of Sciences, No.8, 3rd South Street, Zhongguancun, Haidian, Beijing 100190, China

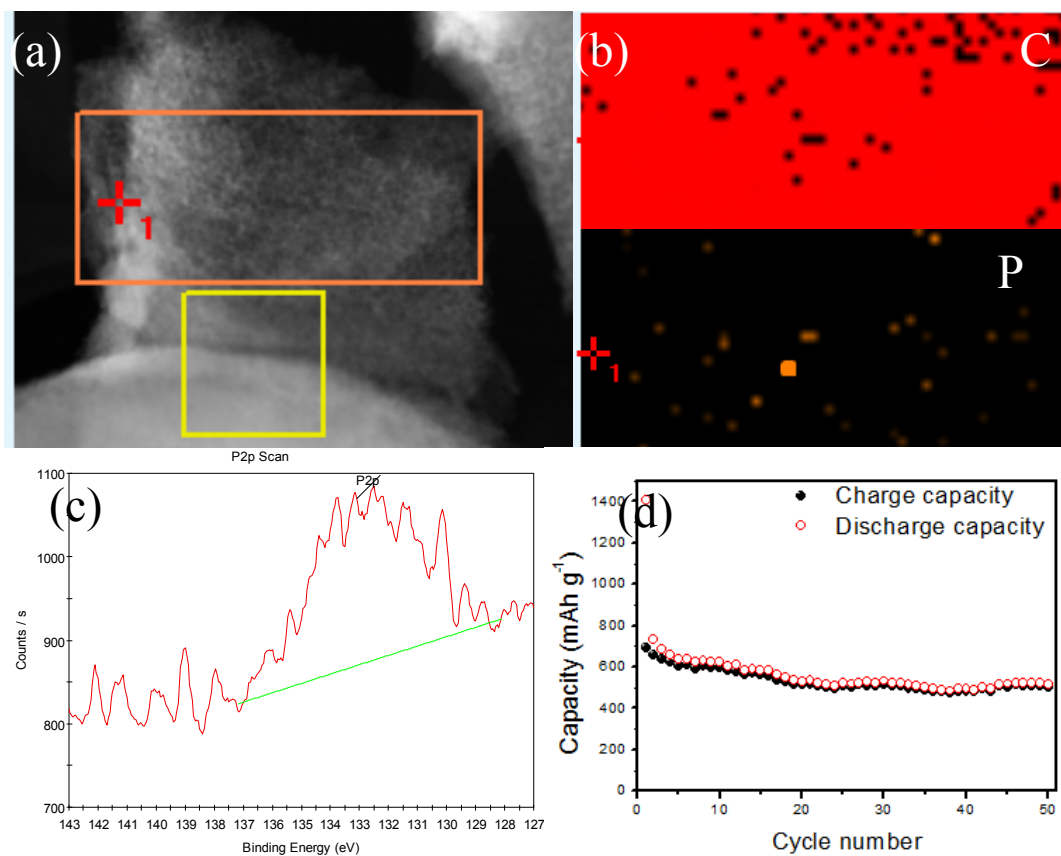

Fig. S1 (a) High-magnification TEM images, (b) EDX mapping images of P and C, (c) P 2p XPS spectrum and (d) Cycling performance at a current density of 100 mA g<sup>-1</sup> of P-PC-RH-0.53.
